# Supplementary material
Source: PubMed Central journal article supplement (PMC5033890)
Supplement: jciinsight-1-85323-s001.pdf [file jciinsight-1-85323-s001.pdf]

## **Supplementary Materials**

### **Supplementary microarray methods**

#### **Microarray labeling, pre-processing and data sets.**

The core collected for gene expression analysis was placed immediately in RNALater (Life Technologies, Carlsbad, CA), kept at 4°C for 4-24 hrs, then stored at -20°C. RNA extraction, quality control and HG\_U133\_Plus\_2.0 GeneChip (Affymetrix, Santa Clara, CA) processing were described previously (1). Detailed protocols are available at ([www.affymetrix.com](http://www.affymetrix.com)).

All microarray analyses were done using the “R” software package, version 3.0.1 (64-bit), with various libraries from Bioconductor 2.8. Microarray expression files are posted on the Gene Expression Omnibus website (GSE36059 and GSE48581). Microarrays from 703 indication biopsies and 8 nephrectomies were normalized with Robust Multiarray Averaging (RMA). Since the material from 403 biopsy set was labeled with 3' IVT One-Cycle Target Labeling and Control Kit, and 300 biopsy set was labeled with 3' IVT Express kit, we used a correction factor to help minimize batch effects using the Ratio-G method (2), after normalization.

The t-tests (ci>1 vs. cid1) identified 3403 probe sets and 10743 probe sets at the p value<0.05 in early and late biopsies, respectively (679 and 10495 probe sets with Benjamini-Hochberg corrected p-values<0.05). Furthermore, there were 10538 and 10855 probe sets at the p value<0.05 in the TxBx uncorrected and corrected comparison (combined early and late biopsies), respectively (10263 and 10618 probe sets with Benjamini-Hochberg corrected p-values<0.05) (Supplementary tables).

The immunoglobulin (IGT) (3), mast cell (MCAT) (4), acute kidney injury (AKI) (5), and fibrillar collagen transcript (FICOL) set scores (6;7) were each defined as the geometric mean of expression for the probe sets (normalized to the eight normal kidney specimens) included in each respective transcript set.

IGT, MCAT and AKI transcripts are listed on our homepage <http://atagc.med.ualberta.ca/Research/GeneLists/Pages/default.aspx>. Injury-repair response transcripts (IRRAT950) were previously published (5).

## **Cultured cells panel**

*Effector T cells:* CD4<sup>+</sup> and CD8<sup>+</sup> T cells from three and five healthy donors, respectively, were generated through allostimulations starting with PBMCs cultured at a ratio of 3:1 with mitomycin C (Sigma, St. Louis, MO)-treated chronic myelogenous leukaemic B cells (*RPMI8866*, ATCC). Recombinant human IL-2 (eBioscience) was added to the cultures at 50 U/mL and cultured for 5 days per round. After four rounds of stimulation, live cells were collected by Ficoll® density gradient centrifugation, followed by CD4<sup>+</sup> and CD8<sup>+</sup> cell purification using EasySep® negative selection kits (StemCell Technologies) according to manufacturer instructions. Cell purity varied between 92% and 98% (assessed by flow cytometry). Effector phenotype was demonstrated by intracellular staining: 95±3% of CD8<sup>+</sup> T cells stained positive for GZMB after the final stimulation, and 96±2% of CD4<sup>+</sup> and 90±3% of CD8<sup>+</sup> T cells stained positive for IFNG upon restimulation (8).

*B cells and NK cells:* B and NK cells were purified from PBMCs using EasySep® negative selection kits (StemCell Technologies). Both cell populations remained unstimulated until the time of RNA extraction. B cells were >97% CD19<sup>+</sup> and NK cells varied between 90 and 98% CD56<sup>+</sup>CD3<sup>-</sup>. Human NK cells were selected from donors with similar high ratios of CD56<sup>lo</sup>/CD56<sup>bright</sup> NK cells, suggestive of a cytolytic phenotype (9). The majority (average 96.1%) of NK cells showed a cytotoxic phenotype (CD56<sup>dim</sup>) as expected in whole blood (10).

*Monocytes:* Monocytes were isolated using EasySep® Human CD14<sup>+</sup> Selection Kit (StemCell) direct from the PBMCs.

*Macrophages:* Monocytes were resuspended in complete RPMI, allowed to adhere on 100 mm plates (BD Falcon), and left for 24 hours, with or without recombinant human IFNG (500 U/mL, eBioscience).

*Dendritic Cells:* Monocytes were cultured for seven days in the presence of IL-4 (500 U/mL, eBioscience) and recombinant human granulocyte-macrophage colony stimulating factor (500 U/mL, eBioscience). DCs were either immature ("Immature DCs"), or they were matured with LPS for a further 24 hours before harvesting ("Mature DCs"). The DC phenotype was characterized as CD14<sup>-</sup>CD11c<sup>+</sup>CD83<sup>+</sup>HLA-DR<sup>HI</sup> by flow cytometry (11-13).

*Parenchymal and endothelial cells:* HUVECs (StemCell Technologies, Vancouver, BC Canada) and human renal proximal tubular epithelial cells (RPTECs) (Lonza Inc., Allendale, NJ, USA) were maintained in tissue culture according to supplier recommendations. Cryopreserved primary RPTECs were purchased from Cambrex (Walkersville, MD, USA) and grown in REGM in 50 mL flasks to 50% confluence. At this point, cells were seeded onto collagen-coated inserts of 6-well plates and grown to 80% confluence in REGM. RPTECs and HUVECs were left untreated or treated with recombinant human IFNG (500 U/mL) for 24 hours. After 48 hours the cells were collected and stored in TRIZOL at -70 °C. Total RNA was extracted and used for analysis by microarrays (14).

*Fibroblasts:* microarray data for keloid fibroblasts was obtained from GEO, GSE7890 (15).

## Reference List

1. Mueller,T.F., Einecke,G., Reeve,J., Sis,B., Mengel,M., Jhangri.G., Bunnag,S., Cruz,J., Wishart,D., Meng,C. et al 2007. Microarray analysis of rejection in human kidney transplants using pathogenesis-based transcript sets. *Am J Transplant* **7**:2712-2722.
2. Luo,J., Schumacher,M., Scherer,A., Sanoudou,D., Megherbi,D.B., Davison,T.S., Shi,T., Tong,W., Shi,L., Hong,H. et al 2012. A comparison of batch effect removal methods for enhancement of prediction performance using MAQC-II microarray gene expression data. *Pharmacogenomics* **10**:278-291.
3. Einecke,G., Reeve,J., Mengel,M., Sis,B., Bunnag,S., Mueller,T.F., and Halloran,P.F. 2008. Expression of B cell and immunoglobulin transcripts is a feature of inflammation in late allografts. *Am J Transplant* **8**:1434-1443.
4. Mengel,M., Reeve,J., Bunnag,S., Einecke,G., Sis,B., Mueller,T., Kaplan,B., and Halloran,P.F. 2009. Molecular correlates of scarring in kidney transplants: the emergence of mast cell transcripts. *Am J Transplant* **9**:169-178.
5. Famulski,K.S., de Freitas,D.G., Kreepala,C., Chang,J., Sellares,J., Sis,B., Mengel,M., Reeve,J., and Halloran,P.F. 2012. Molecular phenotypes of acute kidney injury in human kidney transplants. *JASN* **23**:948-958.
6. Famulski,K.S., Reeve,J., de Freitas,D.G., Kreepala,C., Chang,J., and Halloran,P.F. 2013. Kidney transplants with progressing chronic kidney diseases express high levels of acute kidney injury transcripts. *Am J Transplant* **13**:634-644.
7. Exposito,J.Y., Valcourt,U., Cluzel,C., and Lethias,C. 2010. The Fibrillar Collagen Family. *International Journal of Molecular Sciences* **11**:407-426.
8. Hidalgo,L.G., Einecke,G., Allanach,K., and Halloran,P.F. 2008. The transcriptome of human cytotoxic T cells: similarities and disparities among allostimulated CD4(+) CTL, CD8(+) CTL and NK cells. *Am. J Transplant* **8**:627-636.
9. Nagler,A., Lanier,L.L., Cwirla,S., and Phillips,J.H. 1989. Comparative studies of human FcRIII-positive and negative natural killer cells. *J. Immunol.* **143**:3183-3191.
10. Hidalgo,L.G., Sellares,J., Sis,B., Mengel,M., Chang,J., and Halloran,P.F. 2012. Interpreting NK cell transcripts versus T cell transcripts in renal transplant biopsies. *Am J Transplant* **12**:1180-1191.
11. Sallusto,F., and Lanzavecchia,A. 1994. Efficient presentation of soluble antigen by cultured human dendritic cells is maintained by granulocyte/macrophage colony-stimulating factor plus interleukin 4 and downregulated by tumor necrosis factor  $\alpha$ . *J Exp Med* **179**:1109-1118.
12. Mueller,C.G., Risoan,M.C., Salinas,B., Ait-Yahia,S., Ravel,O., Bridon,J.M., Briere,F., Lebecque,S., and Liu,Y.J. 1997. Polymerase chain reaction selects a novel disintegrin proteinase from CD40-activated germinal center dendritic cells. *J. Exp. Med.* **186**:655-663.
13. van Lieshout,A.W., van der Voort,R., le Blanc,L.M., Roelofs,M.F., Schreurs,B.W., van Riel,P.L., Adema,G.J., and Radstake,T.R. 2006. Novel insights in the regulation of CCL18 secretion by monocytes and dendritic cells via cytokines, toll-like receptors and rheumatoid synovial fluid. *BMC. Immunol.* **7**:23.

14. Hidalgo,L.G., Sis,B., Sellares,J., Campbell,P.M., Mengel,M., Einecke,G., Chang,J., and Halloran,P.F. 2010. NK cell transcripts and NK cells in kidney biopsies from patients with donor-specific antibodies: evidence for NK cell involvement in antibody-mediated rejection. *Am J Transplant.* **10**:1812-1822.
15. Smith,J.C., Boone,B.E., Opalenik,S.R., Williams,S.M., and Russell,S.B. 2008. Gene profiling of keloid fibroblasts shows altered expression in multiple fibrosis-associated pathways. *Journal of Investigative Dermatology* **128**:1298-1310.
